# Supplementary material for: Alps-wide high-resolution 3D modelling reconstruction of glacier geometry and climatic conditions for the Little Ice Age
Source: Copernicus journal article supplement (doi:10.5194/egusphere-2025-2353), 2025-06-05
Supplement: Supplementary file 1 [file egusphere-2025-2353-supplement.pdf]

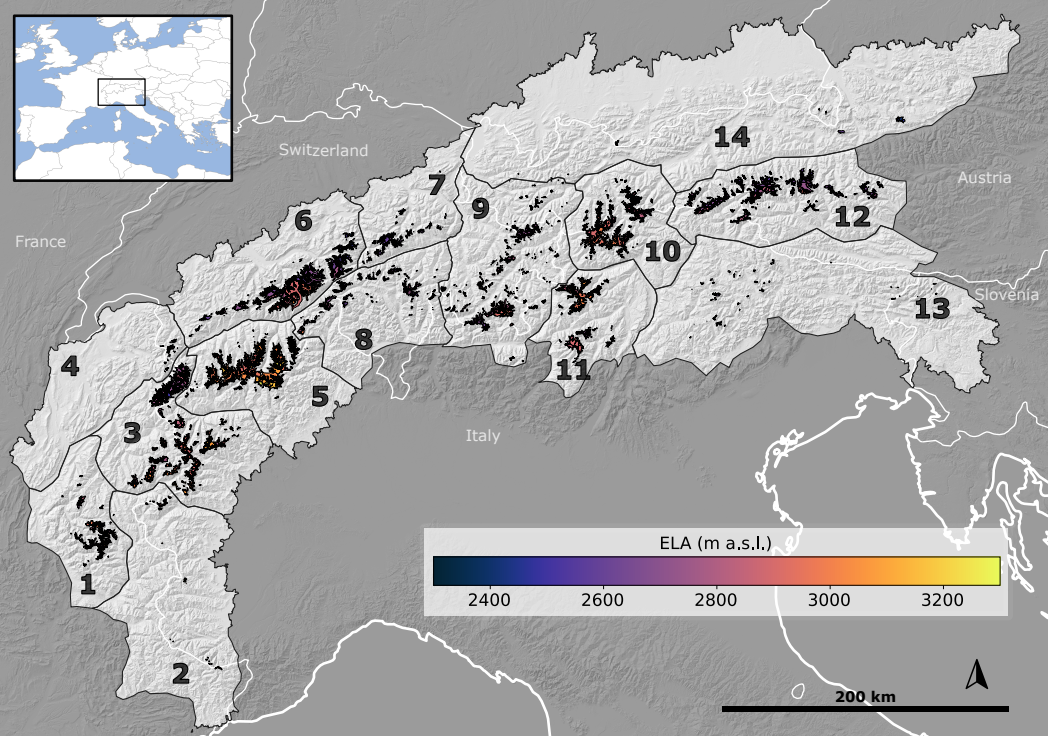

Map of the entire Alps with all model-derived glacier ELAs (this study) using the outlines from the LIA (Reinthal and Paul, 2024b). The 14 regions are adapted from the International Standardised Mountain Subdivision of the Alps (Marazzi, 2004), also used for comparisons by Sommer et al. (2020) and Reinthal and Paul (2025); for region names see Appendix Tab B2. The background map shows the shaded relief obtained from the 30 m resolution AW3D30 DEM (Japan Aerospace Exploration Agency, 2021) with present-day glacier removed using the contemporary ice thickness reconstruction by Cook et al. (2023).
